# Supplementary material for: Virtual Reality Simulator versus Conventional Advanced Life Support Training for Cardiopulmonary Resuscitation Post-Cardiac Surgery: A Randomized Controlled Trial
Source: MDPI journal article supplement (doi:10.3390/jcdd10020067), 2023-02-04
Supplement: s1 [file s1]

## Supplementary Materials S1 – CONSORT Flow Diagram

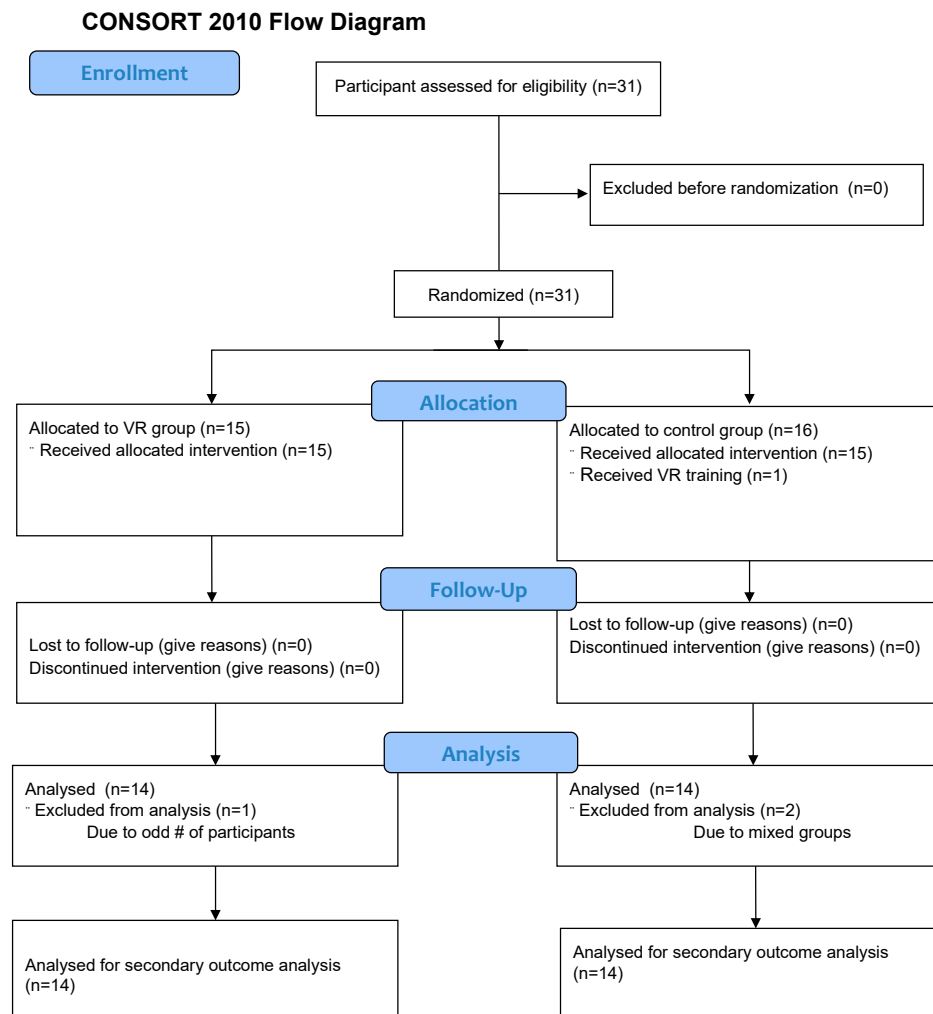

## Supplementary Materials S2 – CONSORT Checklist

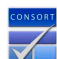

## CONSORT 2010 checklist of information to include when reporting a randomised trial\*

| Section/Topic                    | Item No | Checklist item                                                                                                                                                                              | Reported on page No |
|----------------------------------|---------|---------------------------------------------------------------------------------------------------------------------------------------------------------------------------------------------|---------------------|
| <b>Title and abstract</b>        |         |                                                                                                                                                                                             |                     |
|                                  | 1a      | Identification as a randomised trial in the title                                                                                                                                           | 1                   |
|                                  | 1b      | Structured summary of trial design, methods, results, and conclusions (for specific guidance see CONSORT for abstracts)                                                                     | 3                   |
| <b>Introduction</b>              |         |                                                                                                                                                                                             |                     |
| Background and objectives        | 2a      | Scientific background and explanation of rationale                                                                                                                                          | 4                   |
|                                  | 2b      | Specific objectives or hypotheses                                                                                                                                                           | 5                   |
| <b>Methods</b>                   |         |                                                                                                                                                                                             |                     |
| Trial design                     | 3a      | Description of trial design (such as parallel, factorial) including allocation ratio                                                                                                        | 5                   |
|                                  | 3b      | Important changes to methods after trial commencement (such as eligibility criteria), with reasons                                                                                          | -                   |
| Participants                     | 4a      | Eligibility criteria for participants                                                                                                                                                       | 5                   |
|                                  | 4b      | Settings and locations where the data were collected                                                                                                                                        | 5                   |
| Interventions                    | 5       | The interventions for each group with sufficient details to allow replication, including how and when they were actually administered                                                       | 6                   |
|                                  | 6a      | Completely defined pre-specified primary and secondary outcome measures, including how and when they were assessed                                                                          | 6                   |
| Outcomes                         | 6b      | Any changes to trial outcomes after the trial commenced, with reasons                                                                                                                       |                     |
|                                  | 7a      | How sample size was determined                                                                                                                                                              | 5                   |
| Sample size                      | 7b      | When applicable, explanation of any interim analyses and stopping guidelines                                                                                                                |                     |
| <b>Randomisation:</b>            |         |                                                                                                                                                                                             |                     |
| Sequence generation              | 8a      | Method used to generate the random allocation sequence                                                                                                                                      | 5                   |
|                                  | 8b      | Type of randomisation; details of any restriction (such as blocking and block size)                                                                                                         | 5                   |
| Allocation concealment mechanism | 9       | Mechanism used to implement the random allocation sequence (such as sequentially numbered containers), describing any steps taken to conceal the sequence until interventions were assigned | 5,6                 |
| Implementation                   | 10      | Who generated the random allocation sequence, who enrolled participants, and who assigned participants to interventions                                                                     |                     |
| Blinding                         | 11a     | If done, who was blinded after assignment to interventions (for example, participants, care providers, those                                                                                | 5                   |

|                                                      |     |                                                                                                                                                   |     |
|------------------------------------------------------|-----|---------------------------------------------------------------------------------------------------------------------------------------------------|-----|
|                                                      |     | assessing outcomes) and how                                                                                                                       |     |
| Statistical methods                                  | 11b | If relevant, description of the similarity of interventions                                                                                       | 6   |
|                                                      | 12a | Statistical methods used to compare groups for primary and secondary outcomes                                                                     | 7   |
|                                                      | 12b | Methods for additional analyses, such as subgroup analyses and adjusted analyses                                                                  | 7   |
| <b>Results</b>                                       |     |                                                                                                                                                   |     |
| Participant flow (a diagram is strongly recommended) | 13a | For each group, the numbers of participants who were randomly assigned, received intended treatment, and were analysed for the primary outcome    | 7   |
|                                                      | 13b | For each group, losses and exclusions after randomisation, together with reasons                                                                  | 7   |
| Recruitment                                          | 14a | Dates defining the periods of recruitment and follow-up                                                                                           | 5   |
|                                                      | 14b | Why the trial ended or was stopped                                                                                                                |     |
| Baseline data                                        | 15  | A table showing baseline demographic and clinical characteristics for each group                                                                  | 10  |
| Numbers analysed                                     | 16  | For each group, number of participants (denominator) included in each analysis and whether the analysis was by original assigned groups           | 7   |
|                                                      |     |                                                                                                                                                   |     |
| Outcomes and estimation                              | 17a | For each primary and secondary outcome, results for each group, and the estimated effect size and its precision (such as 95% confidence interval) | 7,8 |
|                                                      | 17b | For binary outcomes, presentation of both absolute and relative effect sizes is recommended                                                       | 7,8 |
| Ancillary analyses                                   | 18  | Results of any other analyses performed, including subgroup analyses and adjusted analyses, distinguishing pre-specified from exploratory         | 7,8 |
|                                                      |     |                                                                                                                                                   |     |
| Harms                                                | 19  | All important harms or unintended effects in each group (for specific guidance see CONSORT for harms)                                             |     |
| <b>Discussion</b>                                    |     |                                                                                                                                                   |     |
| Limitations                                          | 20  | Trial limitations, addressing sources of potential bias, imprecision, and, if relevant, multiplicity of analyses                                  | 8   |
| Generalisability                                     | 21  | Generalisability (external validity, applicability) of the trial findings                                                                         | 8,9 |
| Interpretation                                       | 22  | Interpretation consistent with results, balancing benefits and harms, and considering other relevant evidence                                     | 9   |
| <b>Other information</b>                             |     |                                                                                                                                                   |     |
| Registration                                         | 23  | Registration number and name of trial registry                                                                                                    | 1,5 |
| Protocol                                             | 24  | Where the full trial protocol can be accessed, if available                                                                                       |     |
| Funding                                              | 25  | Sources of funding and other support (such as supply of drugs), role of funders                                                                   | 1   |

\*We strongly recommend reading this statement in conjunction with the CONSORT 2010 Explanation and Elaboration for important clarifications on all the items. If relevant, we also recommend reading CONSORT extensions for cluster randomised trials, non-inferiority and equivalence trials, non-pharmacological treatments, herbal interventions, and pragmatic trials. Additional extensions are forthcoming: for those and for up to date references relevant to this checklist, see [www.consort-statement.org](http://www.consort-statement.org).

**Supplementary Materials S3 - Baseline questionnaire****Participant #** \_\_\_\_\_**Baseline Characteristics Questionnaire**

1. Gender: M / F / rather not say
2. Age: \_\_\_\_\_
3. How many years of work experience do you have in cardiothoracic surgery working as a surgical resident? \_\_\_\_\_
4. How many post-cardiac surgery resuscitation calls have you participated in?
  - ☐ I have never participated in a CPR situation
  - ☐ 1-5 times
  - ☐ 5-10 times
  - ☐ More than 10 times
5. How many emergency re sternotomy procedures have you participated in?
  - ☐ I have never participated in an emergency re sternotomy situation
  - ☐ 1-5 times
  - ☐ 5-10 times
  - ☐ More than 10 times
6. How many emergency re sternotomy procedures for cardiac arrest have you participated in?
  - ☐ I have never participated in an emergency re sternotomy situation
  - ☐ 1-5 times
  - ☐ 5-10 times
  - ☐ More than 10 times
7. Are you familiar with the international guidelines for cardiac arrest after cardiac surgery by the Society of Thoracic Surgeons?<sup>1</sup>
  - ☐ Yes
  - ☐ No
8. Do you have experience with gaming consoles (e.g. computer gaming, Xbox, PlayStation)?
  - ☐ I have never used a gaming console
  - ☐ I have used a gaming console a few times before
  - ☐ I am gaming on a regular basis (at least once a month)
9. How often do you use VR hardware/software (e.g. VR gaming, simulations, consoles, entertainment etc.)?
  - ☐ I have never had a VR experience until today
  - ☐ I have used VR a few times before
  - ☐ I am experienced and use VR on a regular basis (at least once a month)
  - ☐ I am an VR expert (have a VR console and applications myself)

- 
10. Do you have experience with physical simulation trainings (e.g CPR or ALS trainings)?
- ☐ I have never had simulation training before
  - ☐ I have had simulation trainings multiple times before
  - ☐ I am a certified simulation trainer
11. Do you have experience with digital training (e.g. e-learning or serious games)?
- ☐ I have never had such training before
  - ☐ I have had a digital training a few times before
  - ☐ I have had digital trainings multiple times before
12. Do you have experience with simulation training in VR?
- ☐ Yes
  - ☐ No

## Supplementary Materials S4 - Assessment case and form

### Case description (Dutch)

71-jarige vrouw, 3 dagen na een CABG met LIMA LAD, vene op de MO en RDP, voor non-STEMI bij drievats lijden. Patiënt heeft geen pacemakerdraden in situ. De telemetrie gaat af en laat breed complex tachycardie zien van 200/min. Jullie komen de patiënt kamer binnen, met een van de verpleegkundigen, en treffen patiënt bewusteloos aan. Wij geven aan wanneer de anesthesioloog in de kamer is, intubeert en sedeert. De leider heeft de leiding, de chirurg komt de kamer in zodra hij wordt gebeld door de leider, en zal steriel gaan staan met een van de verpleegkundigen.

### Skill Assessment Form

| Skill                                                                            | Completed Correctly |    | Time to action<br>(min:s) | Comments |
|----------------------------------------------------------------------------------|---------------------|----|---------------------------|----------|
|                                                                                  | Yes                 | No |                           |          |
| <b>1. Recognition of the right protocol to use</b>                               |                     |    |                           |          |
| 2. Call resuscitation team                                                       |                     |    |                           |          |
| 3. Call thoracic surgeon                                                         |                     |    |                           |          |
| 4. Time to rhythm check                                                          |                     |    |                           |          |
| 5. Stopped all running infusions                                                 |                     |    |                           |          |
| 6. Time to first shock & third shock (in case of VF/VT)                          |                     |    |                           |          |
| 7. Time to initiate chest compressions (BLS)                                     |                     |    |                           |          |
| 8. Time to initiate bag valve mask ventilation                                   |                     |    |                           |          |
| 9. Time to first drug administration (if applicable)                             |                     |    |                           |          |
| 10. Time to first decision to open the chest                                     |                     |    |                           |          |
| 11. Time to incision                                                             |                     |    |                           |          |
| 12. Removal of steel wires                                                       |                     |    |                           |          |
| 13. Sternal retractor in place                                                   |                     |    |                           |          |
| 14. Sternal retractor open                                                       |                     |    |                           |          |
| 15. Time to internal cardiac massage / clearing space for defibrillation paddles |                     |    |                           |          |
| 16. Time to internal defibrillation (in case of VF/VT)                           |                     |    |                           |          |
| 17. Final rhythm check                                                           |                     |    |                           |          |

## Supplementary Materials S5 – Outlier Detection Statistics and Plots

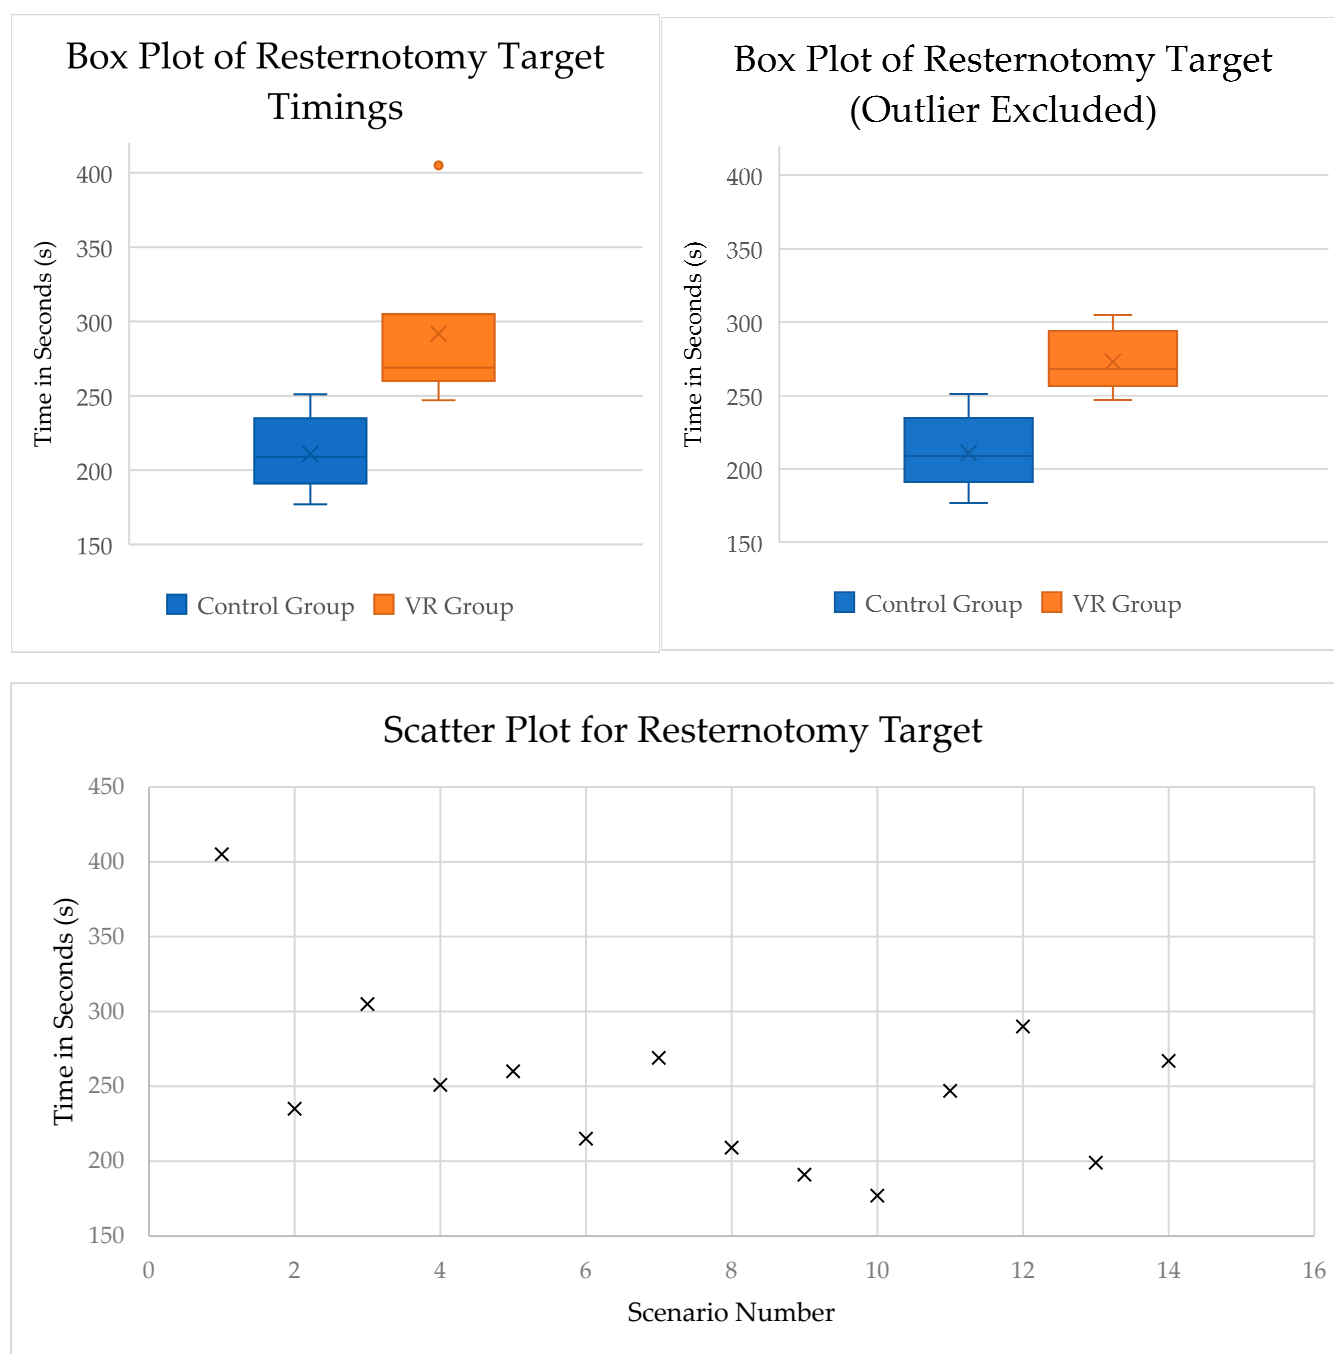

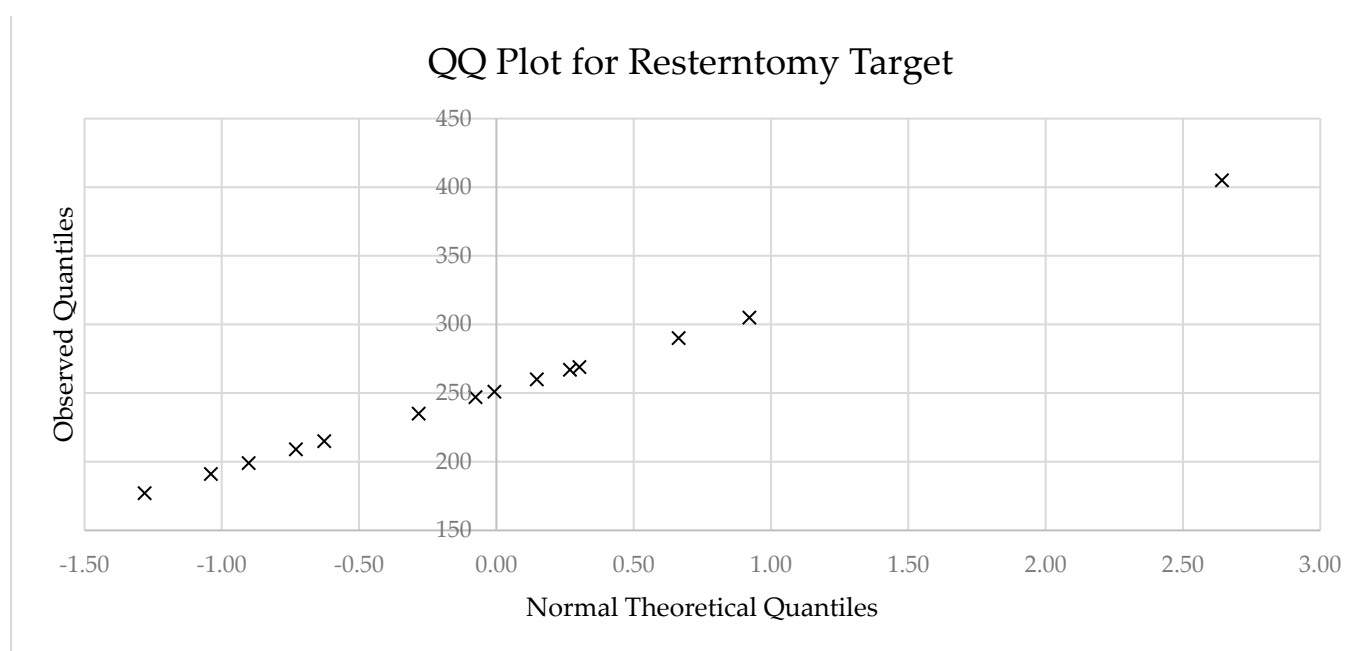


---

**Tukey's Fences Rule (1.5IQR Test)**


---

|                                  |                     |
|----------------------------------|---------------------|
| Quartile 1 Value                 | 210.5               |
| Quartile 3 Value                 | 268.5               |
| Interquartile Range (IQR)        | 58                  |
| 1.5 * IQR                        | 87                  |
| Q3 + 1.5IQR                      | 355.5               |
| Data point in question           | 405                 |
| <b>Data point &gt; Q3+1.5IQR</b> | <b>405&gt;355.5</b> |
| <b>Outlier</b>                   | <b>Yes</b>          |

---



---

**Grubbs' Test**


---

|                         |                   |
|-------------------------|-------------------|
| Maximum Value           | 405               |
| Mean                    | 251.428571        |
| Standard Deviation      | 58.1268034        |
| <b>Grubb's G</b>        | <b>2.64200712</b> |
| Alpha                   | 0.05              |
| Sample Size             | 14                |
| Significance value      | 0.00357143        |
| Degrees of Freedom      | 12                |
| t Critical Value        | 3.23573953        |
| <b>G Critical Value</b> | <b>2.37165358</b> |

---



|                                  |                     |
|----------------------------------|---------------------|
| <b>G&gt;G<sub>critical</sub></b> | <b>2.64&gt;2.37</b> |
| <b>Outlier</b>                   | <b>Yes</b>          |

  

|                             |                       |
|-----------------------------|-----------------------|
| <b>Dixon's Q</b>            |                       |
| Q                           | 0.885                 |
| Degrees of Freedom          | 13                    |
| Alpha                       | 0.001                 |
| Q <sub>ref (R21)</sub>      | 0.713                 |
| <b>Q&gt;Q<sub>ref</sub></b> | <b>0.885&gt;0.713</b> |
| <b>Outlier</b>              | <b>Yes</b>            |
